# Supplementary material
Source: Springer Nature journal article supplement (https://www.springermedizin.de/resource/supplementary/12958_2006_326_MOESM5_ESM.pdf/9567630)

A

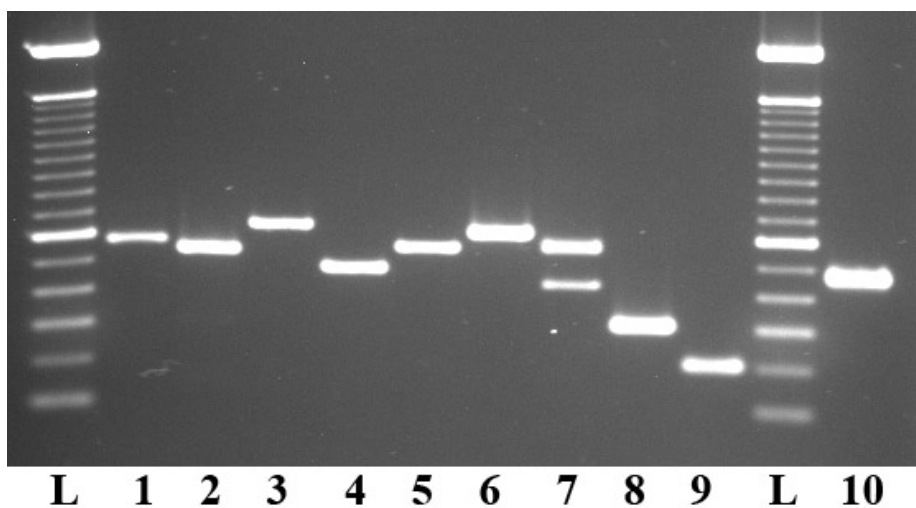

B

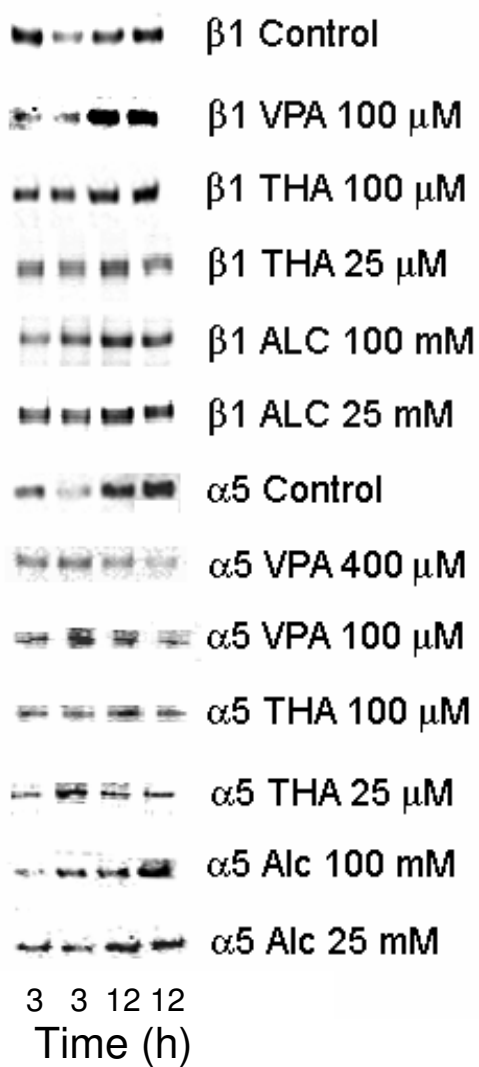

Supplement: MOESM5 [file 9567630]
